# Supplementary material
Source: MDPI journal article supplement (https://www.mdpi.com/1424-2818/15/2/271)
Supplement: s1 [file s1]

Supplementary Table S5. Reproductive compatibility of strains from different populations of *Ulnaria danica* (Uln2b group).

| Population location     | Clone name      |     | BZ 3 | BZ 251 | BZ 264 | LAB 58 | 5.0901-C | 5.0901-D |
|-------------------------|-----------------|-----|------|--------|--------|--------|----------|----------|
|                         |                 | Sex | M    | F      | F      | M      | M        | F        |
| Lake Baikal, Russia     | <b>BZ3</b>      | M   |      |        |        |        |          |          |
| Lake Baikal, Russia     | <b>BZ251</b>    | F   | 3    |        |        |        |          |          |
| Lake Baikal, Russia     | <b>BZ264</b>    | F   | 3    | 0      | [1]    |        |          |          |
| Lake Labyntyr, Russia   | <b>LAB58</b>    | M   | 0    | 3      | 3      | [1]    |          |          |
| Lake Khuvsgu, Mongolia  | <b>5.0901-C</b> | M   | 0    | 3      | 3      | 0      | [1]      |          |
| Lake Khuvsgul, Mongolia | <b>5.0901-D</b> | F   | 2    | 0      | 0      | 3      | 3        |          |

Note. Numbers indicate the relative frequency of sexual reproduction, 0 - absence, 1 - rare, 2 - frequent, 3 - very frequent; gamete morphology and behavior corresponded to female type (F) or male type (M).

Note. Numbers indicate the relative frequency of sexual reproduction, 0 - absence, 1 - rare, 2 - frequent, 3 - very frequent; [ ] - intracloal reproduction; gamete morphology and behavior corresponded to female type (F) or male type (M).
