# Supplementary material
Source: MDPI journal article supplement (https://www.mdpi.com/1424-2818/15/2/271)
Supplement: s1 [file s1]

Supplementary Table S8. Genetic distances between different taxonomic groups of diatoms. The distance in nucleotides was calculated as the expected number of banners of the full blast length in the studied data sets based on the selected model of DNA evolution.

| Taxonomic groups for comparison                                                                                        | Mean genetic distance (%) | 95% confidence interval for genetic distance (%) | Mean genetic distance – expected number of mismatched nucleotides | 95% confidence interval for genetic distance –expected number of mismatched nucleotides |
|------------------------------------------------------------------------------------------------------------------------|---------------------------|--------------------------------------------------|-------------------------------------------------------------------|-----------------------------------------------------------------------------------------|
| <b><i>rbcL</i> genetic marker</b>                                                                                      |                           |                                                  |                                                                   |                                                                                         |
| intraspecies distances - <i>Ulnaria danica</i>                                                                         | 0.4                       | 0.18 – 0.8                                       | 5.6                                                               | 2.5 - 11                                                                                |
| interspecies distances - <i>Ulnaria danica</i> – closest species                                                       | 0.71                      | 0.22 – 1.2                                       | 10                                                                | 3 – 16.7                                                                                |
| intraspecies distances - <i>Ulnaria ulna</i>                                                                           | 0.49                      | 0.19 – 0.8                                       | 6.9                                                               | 2.6 - 11                                                                                |
| interspecies distances - <i>Ulnaria ulna</i> – closest species                                                         | 0.71                      | 0.22 – 1.2                                       | 10                                                                | 3 – 16.7                                                                                |
| <i>Ulnaria danica</i> - <i>Ulnaria ulna</i> intragenus distance                                                        | 0.71                      | 0.22 – 1.2                                       | 10                                                                | 3 – 16.7                                                                                |
| intraspecies distances - <i>Ulnaria acus</i>                                                                           | 0.5                       | 0.4 – 0.6                                        | 7                                                                 | 6–8                                                                                     |
| interspecies distances - <i>Ulnaria acus</i> - closest species                                                         | 1.41                      | 1.12 – 1.7                                       | 19.7                                                              | 16 – 23                                                                                 |
| <i>Ulnaria</i> - maximum intragenus distance                                                                           | 2.95                      | 1.8 – 4.1                                        | 41                                                                | 25 - 57                                                                                 |
| intraspecies distances - <i>Fragilaria radians</i>                                                                     | 0.2                       | 0.1 – 0.3                                        | 3                                                                 | 1 – 4                                                                                   |
| interspecies distances - <i>Fragilaria radians</i> - closest species                                                   | 1.5                       | 0.9–2.1                                          | 20                                                                | 12 - 39                                                                                 |
| <i>Fragilaria</i> intragenus distance                                                                                  | 2.6                       | 2.2 – 3.0                                        | 36                                                                | 30 - 41                                                                                 |
| interspecies distances – <i>Ulnaria danica</i> - <i>Ulnaria ulna</i> – <i>Ulnaria acus</i> - <i>Fragilaria radians</i> | 7.0                       | 3.91 –10.2                                       | 98                                                                | 44 – 142                                                                                |
| <b>18S rRNA genetic marker</b>                                                                                         |                           |                                                  |                                                                   |                                                                                         |
| intraspecies distances - <i>Ulnaria danica</i>                                                                         | 0.45                      | 0.12 – 0.75                                      | 7.6                                                               | 2 – 12.6                                                                                |
| interspecies distances - <i>Ulnaria danica</i> – closest species                                                       | 0.63                      | 0.16 – 1.1                                       | 10.6                                                              | 2.7 – 18.5                                                                              |
| intraspecies distances - <i>Ulnaria ulna</i>                                                                           | 0.47                      | 0.13 – 0.81                                      | 7.9                                                               | 2.2 – 13.6                                                                              |
| interspecies distances - <i>Ulnaria ulna</i> – closest species                                                         | 0.63                      | 0.16 – 1.1                                       | 10.6                                                              | 2.7 – 18.5                                                                              |
| <i>Ulnaria danica</i> - <i>Ulnaria ulna</i> intragenus distance                                                        | 0.63                      | 0.16 – 1.1                                       | 10.6                                                              | 2.7 – 18.5                                                                              |
| intraspecies distances - <i>Ulnaria acus</i>                                                                           | 0.45                      | 0.1 – 0.8                                        | 6                                                                 | 2 - 13                                                                                  |
| interspecies distances - <i>Ulnaria acus</i> - closest species                                                         | 1.2                       | 0.8 – 1.6                                        | 20                                                                | 13 - 31                                                                                 |

|                                                                                                                        |      |            |     |          |
|------------------------------------------------------------------------------------------------------------------------|------|------------|-----|----------|
| <i>Ulnaria</i> - maximum intragenus distance                                                                           | 2.05 | 1.6 – 2.5  | 34  | 26 - 41  |
| intraspecies distances - <i>Fragilaria radians</i>                                                                     | 0.4  | 0.1 - 0.7  | 7   | 2 - 11   |
| interspecies distances - <i>Fragilaria radians</i> - closest species                                                   | 2.3  | 1.7 – 2.9  | 38  | 28 - 48  |
| <i>Fragilaria</i> intragenus distance                                                                                  | 4.5  | 3.2 – 5.1  | 69  | 53 - 85  |
| interspecies distances – <i>Ulnaria danica</i> - <i>Ulnaria ulna</i> – <i>Ulnaria acus</i> - <i>Fragilaria radians</i> | 7.4  | 3.2 – 11.6 | 124 | 53 - 194 |
