# Supplementary material
Source: MDPI journal article supplement (https://www.mdpi.com/1424-2818/15/2/271)
Supplement: s1 [file s1]

Supplementary Table S7. Comparison of the morphological characters for identification among some species of *Fragilaria* and *Ulnaria*

| Features                             | <i>Fragilaria radians</i> (Kützing)<br>D.M.Williams & Round, 1987 | <i>Ulnaria acus</i> (Kützing) | <i>Ulnaria danica</i> (Kützing)<br>Compère & Bukhtiyarova, 2006 | <i>Synedra acus</i> subsp. <i>radians</i> (Kützing)<br>Skabitshevsky 1960 | <i>Synedra acus</i> subsp. <i>acus</i> (Kützing) | <i>Synedra ulna</i> subsp. <i>danica</i> (Kützing)<br>Grunov 1881 | <i>Ulnaria ulna</i> (Nitzsch)<br>Compère 2001 | <i>Ulnaria acus</i> (Kützing)<br>Aboal 2003 | <i>Ulnaria ferefusiformis</i> M.Kulikovsky & H.Lange-Bertalot, 2016 | <i>Ulnaria pilum</i> M.Kulikovsky & H.Lange-Bertalot, 2016 |
|--------------------------------------|-------------------------------------------------------------------|-------------------------------|-----------------------------------------------------------------|---------------------------------------------------------------------------|--------------------------------------------------|-------------------------------------------------------------------|-----------------------------------------------|---------------------------------------------|---------------------------------------------------------------------|------------------------------------------------------------|
| Number of strains studied for SEM    | 22                                                                | 6                             | 16                                                              |                                                                           |                                                  |                                                                   |                                               |                                             | 3                                                                   | 2                                                          |
| Valve outline                        | narrow-lanceolate                                                 |                               |                                                                 | narrow-lanceolate                                                         | linear-lanceolate                                | linear or linear-lanceolate                                       | needle-shaped                                 | linear-lanceolate                           | approximately fusiform                                              | needle-shaped                                              |
| Length (µm)                          | 105-239                                                           | 90-235                        | 99-427                                                          | 142-288                                                                   | 90-250                                           | 235-445                                                           | 230-320                                       | 80-150                                      | 76-152                                                              | 218-295                                                    |
| Width proximally (µm)                | 2.5-5.2                                                           | 2.2-5.4                       | 3.5-6.3                                                         | 2.2-5                                                                     | 4-5                                              | 5-6.4*                                                            | 6.3-7.7                                       | 4.6-5.0                                     | 4.0-4.8                                                             | 5.6-6.3                                                    |
| Width distally below the apices (µm) | 0.8-1.9                                                           | 0.8-1.8                       | 1.6-4.5                                                         | 0.7-1.3*                                                                  | 1.3*                                             | 2.4*                                                              | no data                                       | no data                                     | 0.7-1.2                                                             | no data                                                    |
| Width distally at apices (µm)        | 0.8-2.0                                                           | 0.9-2.0                       | 2.4-4.9                                                         | 1.0-1.8*                                                                  | 1.5*                                             | 1.6-4.0*                                                          | 3-4                                           | no data                                     | 1.4-1.6                                                             | 2.0-2.2                                                    |
| Axial area                           | narrow, linear                                                    | narrow, linear                | narrow, linear                                                  | narrow, linear                                                            | narrow, linear                                   | narrow, linear                                                    | narrow, linear                                | narrow, linear                              | narrow, linear                                                      | narrow, linear                                             |
| Stria arrangement                    | mostly alternating<br>sometimes opposite                          | alternating or opposite       | mostly opposite, sometimes alternating                          | alternating or opposite*                                                  | mostly opposite, sometimes alternating*          | mostly opposite, sometimes alternating*                           | mostly opposite, sometimes alternating        | mostly opposite, sometimes alternating      | alternating or opposite                                             | opposite proximally, alternate distally                    |
| Stria per 10 µm                      | 12-22                                                             | 11-14                         | 9-13                                                            | 11-22                                                                     | 12-14                                            | 8-10                                                              | 9.2-10.4                                      | 10.8-13                                     | 12-14                                                               | 10.0-11.5                                                  |
| Areolae in 10 µm                     | 60-80                                                             | 40-60                         | 40-50                                                           | no data                                                                   | 50-60*                                           | no data                                                           | 30-35                                         | no data                                     | 50                                                                  | 35-40                                                      |
| Areolae in stria                     | 6-14                                                              | 6-9                           | 6-11                                                            | no data                                                                   | 8*                                               | 7-8*                                                              | 5-8                                           | no data                                     | no data                                                             | 6-9                                                        |
| Central area                         | rectangular or circular                                           | rectangular or circular       | circular or rectangular                                         | rectangular or circular                                                   | rectangular, weak ghost striae*                  | rectangular*                                                      | not or centre may be marked by one            | not or circular                             | indistinctly defined due to weak ghost striae                       | rectangular, ghost striae scarce or missing                |

|                                                           |                                                       |                                             |                                             |                                                                                       |                                                                                      |                                                                                      |                                         |                                 |                            |                            |
|-----------------------------------------------------------|-------------------------------------------------------|---------------------------------------------|---------------------------------------------|---------------------------------------------------------------------------------------|--------------------------------------------------------------------------------------|--------------------------------------------------------------------------------------|-----------------------------------------|---------------------------------|----------------------------|----------------------------|
|                                                           |                                                       |                                             |                                             |                                                                                       |                                                                                      |                                                                                      | shortened or<br>lacking stria           |                                 |                            |                            |
| Apex                                                      | rostrate or<br>weakly<br>subcapitate                  | subcapitate                                 | subcapitate                                 | weakly<br>subcapitate                                                                 | subcapitate                                                                          | weakly<br>subcapitate                                                                | protracted<br>and weakly<br>subcapitate | subcapitate                     | subcapitate                | subcapitate                |
| Rimoportula                                               | 2                                                     | 2                                           | 2                                           | 2                                                                                     | 2                                                                                    | 2                                                                                    | 2                                       | 2                               | 2                          | 2                          |
| Marginal spines                                           | irregular<br>arranged, very<br>tiny spines            | absent                                      | absent                                      | no data                                                                               | no data                                                                              | no data                                                                              | absent                                  | absent                          | absent                     | absent                     |
| Apical spines                                             | irregular<br>arranged 2-4<br>spines, varying<br>forms | absent                                      | 2 spines                                    | no data                                                                               | no data                                                                              | no data                                                                              | 2 short blunt<br>dents                  | absent                          | absent                     | 2 spines                   |
| Form of apical<br>pore fields                             | ocellulimbus                                          | ocellulimbus                                | ocellulimbus                                | no data                                                                               | no data                                                                              | no data                                                                              | rectangular                             | no data                         | ocellulimbus               | ocellulimbus               |
| Numbers of<br>transapical rows<br>of apical pore<br>field | 5-8                                                   | 8-11                                        | 12-16                                       | no data                                                                               | no data                                                                              | no data                                                                              | 18-20                                   | no data                         | no data                    | no data                    |
| Numbers of<br>perivalvar rows<br>of apical pore<br>field  | 3-5                                                   | 3-5                                         | 6-8                                         | no data                                                                               | no data                                                                              | no data                                                                              | 12                                      | no data                         | no data                    | no data                    |
| References                                                | This study<br>(strains from<br>Lake Baikal)           | This study<br>(strains from<br>Lake Baikal) | This study<br>(strains from<br>Lake Baikal) | Popovskaya et al.,<br>2011<br>*measured by<br>TEM and SEM:<br>Table 57, Figs 5-<br>11 | Popovskaya et<br>al., 2011<br>*measured by<br>TEM and SEM:<br>Table 56, Figs 1-<br>3 | Popovskaya et<br>al., 2011<br>*measured by<br>TEM and SEM:<br>Table 60, Figs 2-<br>9 | Lange–<br>Bertalot &<br>Ulrich 2014     | Lange–Bertalot<br>& Ulrich 2014 | Kulikovskiy et<br>al. 2016 | Kulikovskiy et<br>al. 2016 |
