# Supplementary material
Source: MDPI journal article supplement (https://www.mdpi.com/1424-2818/15/2/271)
Supplement: s1 [file s1]

Supplementary Table S4. Reproductive compatibility of strains from different populations of *Ulnaria acus* (Uln1 group).

| Population location (parental clones)  | Clone name | Sex | 0.0224-OE | 0.0316-YE | 5.0903-A | 5.0903-F | MM 244 | AxBK 280 | 3.0213-B | 3.0213-C | 5.0227-E | 5.0227-F | 0.0228-YB | 0.0228-YD | 0.0228-YH | 0.0319-YA | 0.0319-YB | 0.0319-YC |
|----------------------------------------|------------|-----|-----------|-----------|----------|----------|--------|----------|----------|----------|----------|----------|-----------|-----------|-----------|-----------|-----------|-----------|
|                                        |            |     | F         | M         | F        | M        | M      | M        | F        | F        | M        | F        | M         | F         | F         | F         | M         | M         |
| river Erdre, France                    | 0.0224-OE  | F   |           |           |          |          |        |          |          |          |          |          |           |           |           |           |           |           |
| river Erdre, France                    | 0.0316-YE  | M   | 3         |           |          |          |        |          |          |          |          |          |           |           |           |           |           |           |
| Lake Khuvsgul, Mongolia                | 5.0903-A   | F   | 0         | 3         |          |          |        |          |          |          |          |          |           |           |           |           |           |           |
| Lake Khuvsgul, Mongolia                | 5.0903-F   | M   | -         | 0         | 2        |          |        |          |          |          |          |          |           |           |           |           |           |           |
| Lake Baikal, Russia                    | MM 244     | M   | -         | 0         | 2        | 0        |        |          |          |          |          |          |           |           |           |           |           |           |
| Lake Baikal, Russia                    | AxBK 280   | M   | 3         | 0         | 3        | 0        | 0      |          |          |          |          |          |           |           |           |           |           |           |
| Lake Baikal, Russia                    | 3.0213-B   | F   | -         | 3         | 0        | -        | 2      | 3        |          |          |          |          |           |           |           |           |           |           |
| Lake Baikal, Russia                    | 3.0213-C   | F   | -         | 2         | 0        | 2        | 2      | 3        | 0        |          |          |          |           |           |           |           |           |           |
| Lake Matana, Indonesia                 | 5.0227-E   | M   | 2         | 0         | -        | 0        | -      | 0        | -        | 1        |          |          |           |           |           |           |           |           |
| Lake Matana, Indonesia                 | 5.0227-F   | F   | 0         | 3         | 0        | 2        | -      | 0        | 0        | 0        | 3        |          |           |           |           |           |           |           |
| Baikal + Khuvsgul (AxBK280 + 5.0903-A) | 0.0228-YB* | M   | -         | 0         | -        | 0        | 0      | 0        | -        | -        | 0        | -        |           |           |           |           |           |           |
| Baikal + Khuvsgul (AxBK280 + 5.0903-A) | 0.0228-YD* | F   | 0         | -         | 0        | 2        | 3      | 2        | 0        | 0        | 2        | 0        | 2         |           |           |           |           |           |
| Baikal + Khuvsgul (AxBK280 + 5.0903-A) | 0.0228-YH* | F   | 0         | -         | 0        | 2        | 2      | 3        | 0        | 0        | 2        | 0        | 1         | 0         |           |           |           |           |
| Baikal + Matana (AxBK280 + 5.0227-F)   | 0.0319-YA* | F   | 0         | 2         | 0        | 3        | 3      | 3        | 0        | 0        | 2        | 0        | 3         | 0         | 0         |           |           |           |
| Baikal + Matana (AxBK280 + 5.0227-F)   | 0.0319-YB* | M   | 3         | 0         | 3        | 0        | 0      | 0        | 3        | 2        | 0        | 2        | 0         | 3         | -         | -         |           |           |
| Baikal + Matana (AxBK280 + 5.0227-F)   | 0.0319-YC* | M   | 3         | 0         | 1        | 0        | 0      | 0        | -        | 2        | 0        | 2        | 0         | 2         | -         | -         | 0         |           |

Note. Numbers indicate the relative frequency of sexual reproduction, 0 - absence, 1 - rare, 2 - frequent, 3 - very frequent; - not examined; gamete morphology and behavior corresponded to female type (F) or male type (M); \* - first generation (F1) descendants.
