# Supplementary material
Source: MDPI journal article supplement (https://www.mdpi.com/1424-2818/15/2/271)
Supplement: s1 [file s1]

Supplementary Table S6. Ranges of morphometric measurements.

| №                | Name of strain | Sampling site                                    | Length (µm) | Width proximally (µm) | Width distally at apices (µm) | Stria per 10 µm | Areolae in stria | Areolae in 1 µm |
|------------------|----------------|--------------------------------------------------|-------------|-----------------------|-------------------------------|-----------------|------------------|-----------------|
| <b>Fra group</b> |                |                                                  |             |                       |                               |                 |                  |                 |
| 1.               | MM99           | Lake Baikal, Strait Olkhon Gate                  | 168-177     | 3.0-3.9               | 1.1-1.7                       | 19-22           | 6-10             | 7               |
| 2.               | MM101          | Lake Baikal, Kurkutsky Bay                       | 161-167     | 3.2-4.2               | 0.9-1.4                       | 20-21           | 6-10             | 7-8             |
| 3.               | MM103          | Lake Baikal, Kurkutsky Bay                       | 204-237     | 3.7-4.8               | 1.0-1.7                       | 12-16           | 7-10             | 7-8             |
| 4.               | MM106          | Lake Baikal, Kurkutsky Bay                       | 231-239     | 3.5-5.2               | 1.3-1.8                       | 13-14           | 7-8              | n.d.            |
| 5.               | ACH111         | Lake Baikal, Akademician Ridge                   | 150-173     | 3.0-4.0               | 1.0-1.4                       | 20-21           | 7-9              | 7               |
| 6.               | MM113          | Lake Baikal, Cape Khoboy                         | 150-168     | 3.4-5.0               | 0.8-2.0                       | 20-22           | 7-14             | 6-7             |
| 7.               | MM144          | Lake Baikal, Strait Olkhon Gate                  | 159-166     | 2.5-3.4               | 0.9-1.4                       | 19-22           | 6-9              | 7-8             |
| 8.               | BK146          | Lake Baikal, near the settlement of Bolshie Koty | 208-222     | 3.1-4.2               | 1.2-1.9                       | 11-14           | 6-7              | 7               |
| 9.               | L149           | Lake Baikal, Listvennichneyi Bay                 | 150-172     | 2.5-3.9               | 1.1-1.9                       | 20-22           | 8-10             | 7               |
| 10.              | L150           | Lake Baikal, Listvennichneyi Bay                 | 159-171     | 2.5-4.0               | 1.0-1.4                       | 20-22           | 7-9              | 7               |
| 11.              | MM239          | Lake Baikal, Strait Olkhon Gate                  | 120-159     | 3.0-3.6               | 0.8-1.1                       | 18-21           | 7-8              | 7               |
| 12.              | MM240          | Lake Baikal, Strait Olkhon Gate                  | 161-231     | 3.2-4.4               | 1.2-2.0                       | 13-22           | 6-13             | 6-7             |
| 13.              | MM243          | Lake Baikal, Strait Olkhon Gate                  | 122-159     | 3.1-4.7               | 1.0-1.7                       | 20-22           | 8-11             | 7               |

| №                                      | Name of strain | Sampling site                                    | Length (µm)    | Width proximally (µm) | Width distally at apices (µm) | Stria per 10 µm | Areolae in stria | Areolae in 1 µm |
|----------------------------------------|----------------|--------------------------------------------------|----------------|-----------------------|-------------------------------|-----------------|------------------|-----------------|
| 14.                                    | MM245          | Lake Baikal, Strait Olkhon Gate                  | 137-191        | 3.1-4.0               | 1.1-1.7                       | 20-22           | 7-10             | 6-7             |
| 15.                                    | MM246          | Lake Baikal, Strait Olkhon Gate                  | 148-177        | 3.3-4.2               | 1.3-1.9                       | 19-22           | 7-10             | 6-7             |
| <b>Fra group (<i>rbcL</i> - n.d.*)</b> |                |                                                  |                |                       |                               |                 |                  |                 |
| 16.                                    | MM102          | Lake Baikal, Kurkutsky Bay                       | 154-224        | 3.0-4.8               | 1.2-1.9                       | 14-22           | 7-8              | 7               |
| 17.                                    | ACH108         | Lake Baikal, Akademician Ridge                   | 166-222        | 2.5-4.3               | 1.0-3.0                       | 13-21           | 5-9              | 6-7             |
| 18.                                    | ACH112         | Lake Baikal, Akademician Ridge                   | 135-173        | 2.9-3.8               | 0.8-1.6                       | 19-22           | 6-11             | 6-7             |
| 19.                                    | BK145          | Lake Baikal, near the settlement of Bolshie Koty | 317-331        | 2.9-4.1               | 1.1-1.7                       | 13-15           | 6-7              | 7               |
| 20.                                    | L148           | Lake Baikal, Listvennichneyi Bay                 | 105-171        | 2.5-4.1               | 1.0-1.6                       | 19-21           | 7-9              | 7               |
| 21.                                    | MM242          | Lake Baikal, Strait Olkhon Gate                  | 110-149        | 2.8-3.8               | 0.9-1.6                       | 20-21           | 8-10             | н.д             |
| <b>21 strains</b>                      |                |                                                  | <b>105-331</b> | <b>2.5-5.2</b>        | <b>0.8-1.9</b>                | <b>12-22</b>    | <b>5-14</b>      | <b>6-8</b>      |
| <b>Uln1 group</b>                      |                |                                                  |                |                       |                               |                 |                  |                 |
| 1.                                     | MM98           | Lake Baikal, Strait Olkhon Gate                  | 230-235        | 3.6-4.7               | 1.4-1.9                       | 12-14           | 8                | 4-5             |
| 2.                                     | MM117          | Lake Baikal, Cape Khoboy                         | 133-181        | 2.2-3.0               | 0.8-1.8                       | 13-14           | 6-7              | 6               |
| 3.                                     | MM244          | Lake Baikal, Strait Olkhon Gate                  | 195-203        | 4.1-5.4               | 1.3-1.8                       | 11-13           | 7-11             | 5-6             |
| 4.                                     | 3B357          | Lake Baikal, 3 km from Baikalskoe                | 90-144         | 2.7-3.6               | 0.8-1.6                       | 11-13           | 5-8              | 6-7             |
| 5.                                     | AxBK280        | Lake Baikal, near the settlement of Bolshie Koty | 105-241        | 2.8-5.1               | 0.9-1.3                       | 13-16           | 5-8              | 6               |

| №                                       | Name of strain | Sampling site                                    | Length (µm)   | Width proximally (µm) | Width distally at apices (µm) | Stria per 10 µm | Areolae in stria | Areolae in 1 µm |
|-----------------------------------------|----------------|--------------------------------------------------|---------------|-----------------------|-------------------------------|-----------------|------------------|-----------------|
| 6.                                      | AxA6           | Lake Baikal, near the settlement of Bolshie Koty | 67-86         | 3.4-4.6               |                               | 14-18           | 7                | 6               |
| 7.                                      | 5.0903-A       | Lake Khuvsgul                                    | 50-157        | 3-4.8                 | 0.9-1.7                       | 12-15           | 6-9              | 5-6             |
| 8.                                      | 5.0227-F       | Lake Matano                                      | 92-183        | 4.1-5.6               | 1.2-2.7                       | 10-15           | 7-9              | 5-6             |
| 9.                                      | 0.0228-YH      | hybrid AxBK280 and 5.0903A                       | 211-334       | 3.8-5                 | 1.6-2.4                       | 13-15           | 6-10             | 5-6             |
| 10.                                     | 0.0228-YD      | hybrid AxBK280 and 5.0903A                       | 169-280       | 4-6.3                 | 1.1-2                         | 13-18           | 7-11             | 5-6             |
| 11.                                     | 0.0228-B       | hybrid AxBK280 and 5.0903A                       | 78-102        | 3.3-4.7               | 1.4-2.1                       | 13-16           | 6-9              | 5-6             |
| 12.                                     | 0.0319-YB      | hybrid AxBK280 and 5.0227-F                      | 212-266       | 3.5-4.6               | 1.4-2                         | 13-16           | 6-9              | 5-6             |
| 13.                                     | 0.0319-A       | hybrid AxBK280 and 5.0227-F                      | 177-280       | 3.5-5.4               | 1.5-3.1                       | 12-15           | 6-10             | 5-6             |
| <b>Uln1 group (<i>rbcL</i> - n.d.*)</b> |                |                                                  |               |                       |                               |                 |                  |                 |
| 14.                                     | 3B355          | Lake Baikal, 3 km from Baikalskoe                | 190-201       | 3.0-3.7               | 0.9-1.4                       | 12-14           | 7-6              | 6-7             |
| 15.                                     | ACH274         | Lake Baikal, Akademician Ridge                   | 212-230       | 2.5-3.5               | 1.1-1.6                       | 11-14           | 5-9              | 5-6             |
| <b>10 strains (excluding hybrids)</b>   |                |                                                  | <b>67-235</b> | <b>2.2-5.4</b>        | <b>0.8-1.9</b>                | <b>11-18</b>    | <b>5-11</b>      | <b>4-7</b>      |
| <b>Uln2 group</b>                       |                |                                                  |               |                       |                               |                 |                  |                 |
| <b>Uln2a group</b>                      |                |                                                  |               |                       |                               |                 |                  |                 |
| 1.                                      | LAB59          | Lake Labyntyr                                    | 227-241       | 5.0-5.9               | 1.7-2.4                       | 10-12           | 6-10             | 4-5             |
| <b>Uln2b group</b>                      |                |                                                  |               |                       |                               |                 |                  |                 |
| 2.                                      | BZ 1           | Bargusinsky Bay                                  | 288-375       | 3.9-5.2               | 1.6-2.7                       | 10-12           | 6-8              | 4               |
| 3.                                      | BZ3            | Bargusinsky Bay                                  | 193-250       | 3.5-4.9               | 2.2-3.2                       | 11-13           | 5-7              | 5               |
| 4.                                      | LAB55          | Lake Labyntyr                                    | 258-264       | 4.4-6.3               | 1.9-2.9                       | 9-11            | 6-10             | 4-5             |
| 5.                                      | LAB58          | Lake Labyntyr                                    | 215-220       | 4.6-5.8               | 1.8-2.9                       | 10-13           | 7-9              | 4-5             |

| №                                        | Name of strain | Sampling site                    | Length (µm)   | Width proximally (µm) | Width distally at apices (µm) | Stria per 10 µm | Areolae in stria | Areolae in 1 µm |
|------------------------------------------|----------------|----------------------------------|---------------|-----------------------|-------------------------------|-----------------|------------------|-----------------|
| 6.                                       | MM121          | Lake Baikal, Cape Zunduk         | 185-343       | 4.0-5.2               | 2.2-4.5                       | 10-12           | 5-11             | 4-5             |
| 7.                                       | BZ251          | Lake Baikal, Bargusinsky Bay     | 323-348       | 5.1-6.0               | 2.5-3.5                       | 9-11            | 7-9              | 4               |
| 8.                                       | L252           | Lake Baikal, Listvennichneyi Bay | 99-149        | 3.6-6.3               | 1.6-3.0                       | 11-13           | 7-10             | 4-5             |
| 9.                                       | BZ264          | Lake Baikal, Bargusinsky Bay     | 241-345       | 4.4-5.0               | 2.0-2.8                       | 10-12           | 6-7              | 4               |
| 10.                                      | ChZ442         | Lake Baikal, Chivyrkuysky Bay    | 303-417       | 4.0-5.4               | 2.1-4.0                       | 10-11           | 6-7              | 4               |
| <b>Uln2 group (<i>rbcL</i> - n.d. *)</b> |                |                                  |               |                       |                               |                 |                  |                 |
| 11.                                      | BZ7            | Lake Baikal, Bargusinsky Bay     | 370-427       | 4.2-5.5               | 1.9-2.9                       | 11-12           | 6-9              | 4               |
| 12.                                      | BZ40           | Lake Baikal, Bargusinsky Bay     | 340-347       | 4.2-5.6               | 1.8-2.5                       | 11-12           | 6-8              | н.д.            |
| 13.                                      | LAB57          | Lake Labyntyr                    | 232-238       | 4.4-5.8               | 2.0-2.9                       | 10-12           | 6-8              | 4               |
| 14.                                      | LAB62          | Lake Labyntyr                    | 235-240       | 5.5-6.4               | 2.3-3.3                       | 11-12           | 7-9              | н.д.            |
| 15.                                      | LAB62/1        | Lake Labyntyr                    | 267-274       | 5.4-6.4               | 1.4-3.0                       | 9-10            | 8-10             | н.д.            |
| <b>15 strains</b>                        |                |                                  | <b>99-427</b> | <b>3.5-6.4</b>        | <b>1.4-4.5</b>                | <b>9-13</b>     | <b>6-11</b>      | <b>4-5</b>      |

\* - Strains for which the *rbcL* genes have not been sequenced.
